# Supplementary material for: Transcriptomic Responses to Coaggregation between Streptococcus gordonii and Streptococcus oralis
Source: PubMed Central journal article supplement (PMC8552878; doi:10.1128/aem.01558-21), 2021-10-28
Supplement: aem.01558-21-s0001.pdf [file aem.01558-21-s0001.pdf]

# Transcriptomic Responses to Coaggregation between *Streptococcus gordonii* and *Streptococcus oralis*

Siew Woh Choo, Waleed K. Mohammed, Naresh V. R. Mutha, Nadia Rostami, Halah Ahmed, Natalio Krasnogor, Geok Yuan Annie Tan, Nicholas S. Jakubovics

## Supplementary Information

**Supplementary Table 1. Genome statistics of *S. oralis*34.** All statistics are based on contigs of size  $\geq 500$  bp, unless otherwise noted (e.g., "# contigs ( $\geq 0$  bp)" and "Total length ( $\geq 0$  bp)" include all contigs.)

| Statistics without reference   |         |
|--------------------------------|---------|
| # contigs                      | 6       |
| # contigs ( $\geq 0$ bp)       | 25      |
| # contigs ( $\geq 1000$ bp)    | 5       |
| Largest contig                 | 1534347 |
| Total length                   | 1904876 |
| Total length ( $\geq 0$ bp)    | 1912045 |
| Total length ( $\geq 1000$ bp) | 1904349 |
| N50                            | 1534347 |
| N75                            | 1534347 |
| L50                            | 1       |
| L75                            | 1       |
| GC (%)                         | 41.2    |

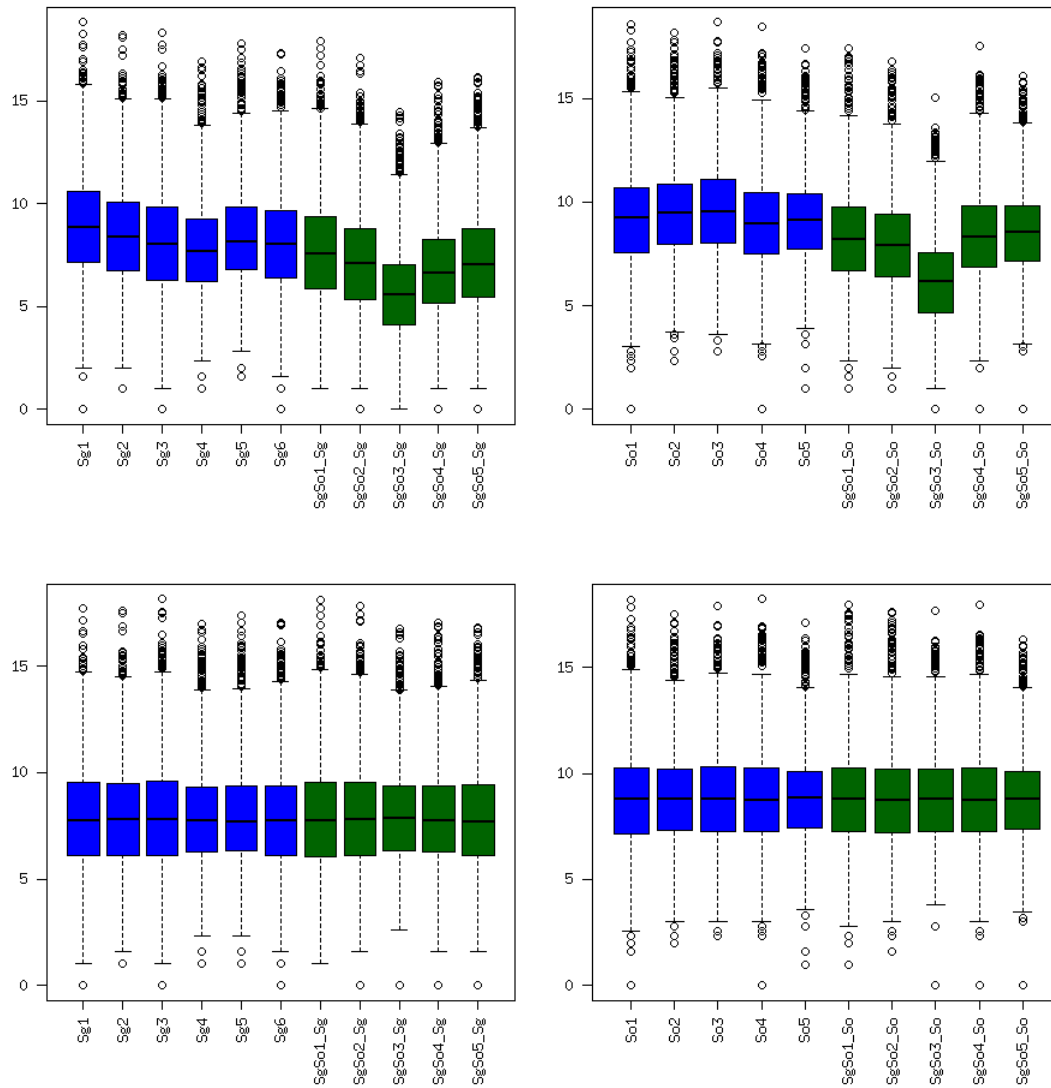

**Supplementary Figure 1: Distribution of normalized read counts in SgSo experiments.**

Counts were normalized by the Trimmed Mean of M-values approach. Median counts from each sample are shown as thick black lines surrounded by a box representing the interquartile range, with whiskers that extend to two standard deviations from the median. Outlying observations are shown as open circles. Data from biological replicates for each sample are shown.

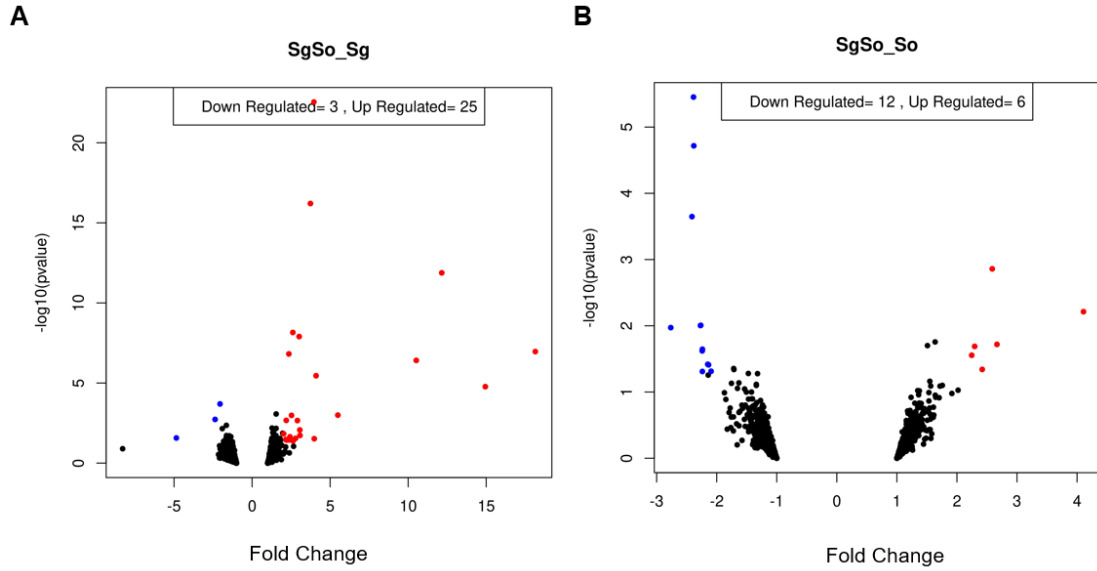

**Supplementary Figure 2: Volcano plots representing differentially expressed genes in coaggregates vs monocultures for (A) *S. gordonii* and (B) *S. oralis*.** The y-axis corresponds to the mean expression value of  $\log_{10}$  (P value), and the x-axis displays the  $\log_2$  (fold change) value. The green and red dots correspond to significantly down and up-regulated genes, respectively. The black dots represent genes that are not significantly expressed.

**Supplementary Table 2. List of common *S. gordonii* genes between the three pairings of SgFn, SgVp and SgSo.**

| <b>Comparisons</b>   | <b>No. of Genes</b> | <b>Locus Tag</b> | <b>Gene Description</b>              | <b>Fold Change SgFn/SgVp/SgSo</b> |
|----------------------|---------------------|------------------|--------------------------------------|-----------------------------------|
| SgFn vs SgVp vs SgSo | 0                   | -                | -                                    | -                                 |
| SgFn vs SgVp         | 6                   | SGO_RS10595      | truncated hypothetical protein       | 2.5/2.62                          |
|                      |                     | SGO_RS03085      | recombination regulator              | 2.84/-2.88                        |
|                      |                     | SGO_RS04880      | short-chain dehydrogenase            | -2.32/-2.75                       |
|                      |                     | SGO_RS05750      | thiamine biosynthesis protein        | -2.46/-2.04                       |
|                      |                     | SGO_RS03460      | Fur family transcriptional regulator | 2.42/-2.68                        |
|                      |                     | SGO_RS07435      | tagatose-6-phosphate kinase          | -3.22/-2.72                       |
| SgFn vs SgSo         | 0                   |                  | -                                    | -                                 |
| SgSo vs SgVp         | 1                   | SGO_RS03395      | pf08796 family protein               | 2.89/3.031                        |
